# Supplementary material for: Monitoring Antifungal Agents of Artemisia annua against Fusarium oxysporum and Fusarium solani, Associated with Panax notoginseng Root-Rot Disease
Source: PubMed Central journal article supplement (PMC6337599; doi:10.3390/molecules24010213), 2019-01-08
Supplement: molecules-24-00213-s001.pdf [file molecules-24-00213-s001.pdf]

# Supporting Information

## Material and Methods

The EO was extracted from the petroleum ether extract (2.6 g) of *A. annua*. Then 0.95 g of the EO was extracted by steam distillation with 100 mL distilled water. The non-volatile component was 1.43 g. The EO and non-volatile components obtained from *A. annua* were respectively dissolved in a mixture solution of 10/1000 DMSO and 1/1000 Tween 80, and the final concentration was 50 mg/mL. Then the effect of different parts on pathogens were carried out according to the oxford cup method above.

## Results and Analysis

The yield of EO was obtained by hydrodistillation of an air-dried sample with a yield of 36.54% (w/w) from the petroleum ether extract. From the experimental results (Figure 5), it could be concluded that the colony diameters from non-volatile components on the two pathogenic fungi are much small compared with the control group. After treatment with non-volatile components, the colony diameters for *F. oxysporum* and *F. solani* are 49.00 mm and 46.17 mm, respectively (Figure 5 A<sub>2</sub>, B<sub>2</sub>). However, with the treatment by EO, the diameter of the colonies for *F. oxysporum* and *F. solani* was 28.83 mm and 29.33 mm. The colony diameter with the treatment of EO is greatly reduced, compared with the non-volatile components (Figure 5 A<sub>1</sub>, B<sub>1</sub>). Therefore, it is further proved that EO played an important role in antifungal activity, and the inhibitory effect of the EO on the pathogenic fungi is remarkable. This comparison provides the basis for *in vivo* concentration design of the petroleum ether extract.

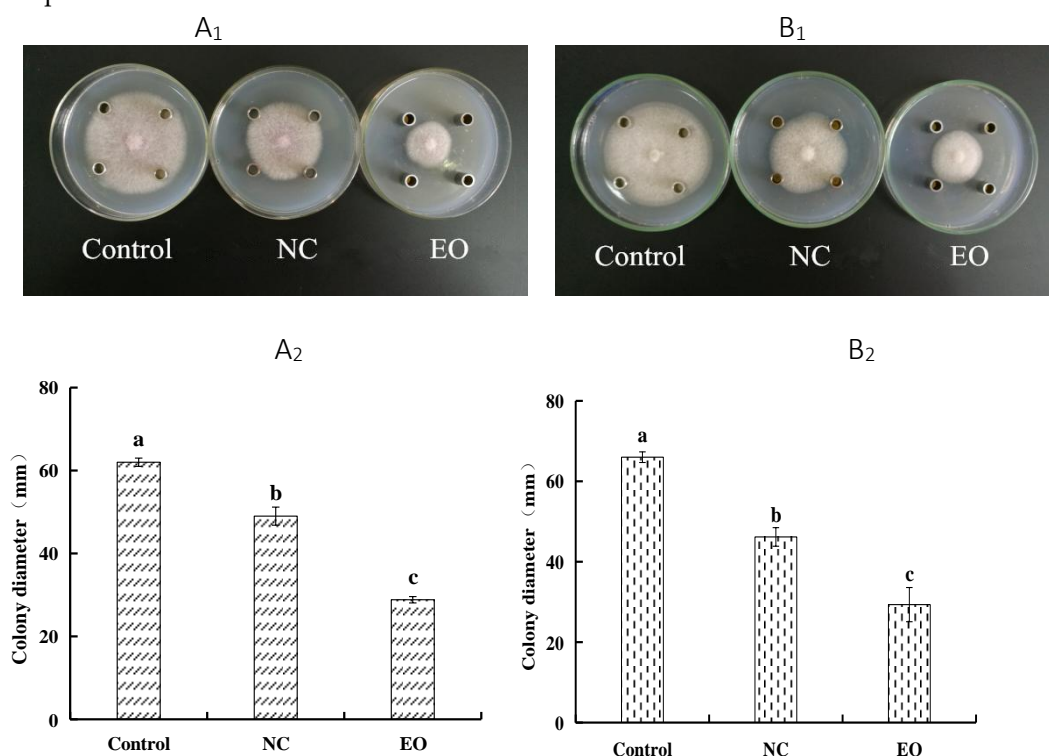

**Figure S1.** Inhibitory effect of non-volatile components and EO from *A. annua* on *F. oxysporum* and *F. solani*. Note, NC: Non-volatile components, EO: Essential oil. A<sub>1</sub>: The mycelium growth of *F. oxysporum* for 5 days. B<sub>1</sub>: The mycelium growth of *F. solani* for 5 days. A<sub>2</sub>: The colony diameter of *F. oxysporum* under different components. B<sub>2</sub>: The colony diameter of *F. solani* under different components.
